# Supplementary material
Source: Springer Nature journal article supplement (https://www.springermedizin.de/resource/supplementary/12871_2014_240_MOESM2_ESM.pdf/9429216)

A

ventral

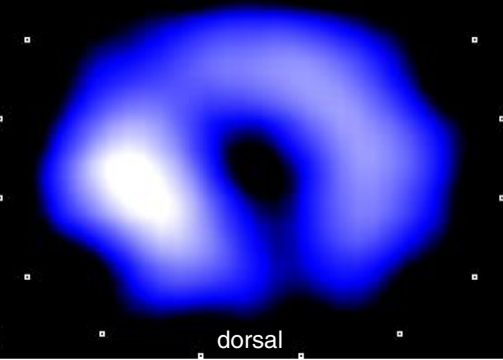

B

ventral

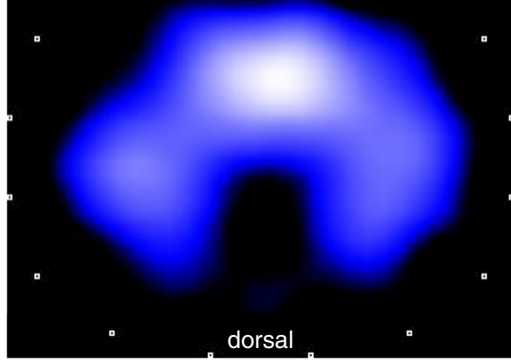

High

Impedance  
change

Low

Supplement: MOESM2 [file 9429216]
